# Supplementary material
Source: Elsevier journal article supplement (https://www.sciencedirect.com/science/article/pii/S2254887420301466)

**Figure S1. Funnel plot for assessing reporting bias for mean incubation period**

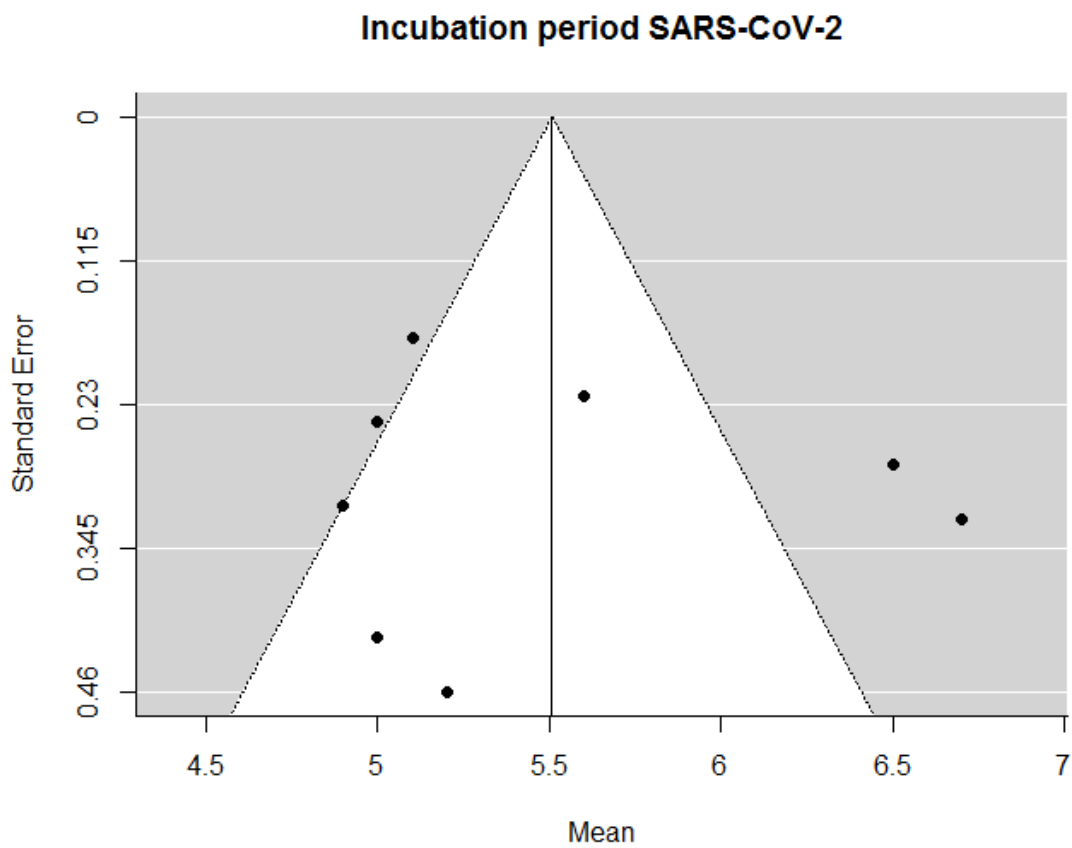

**Figure S2. Funnel plot for assessing reporting bias for the 95%tile of the incubation period distribution**

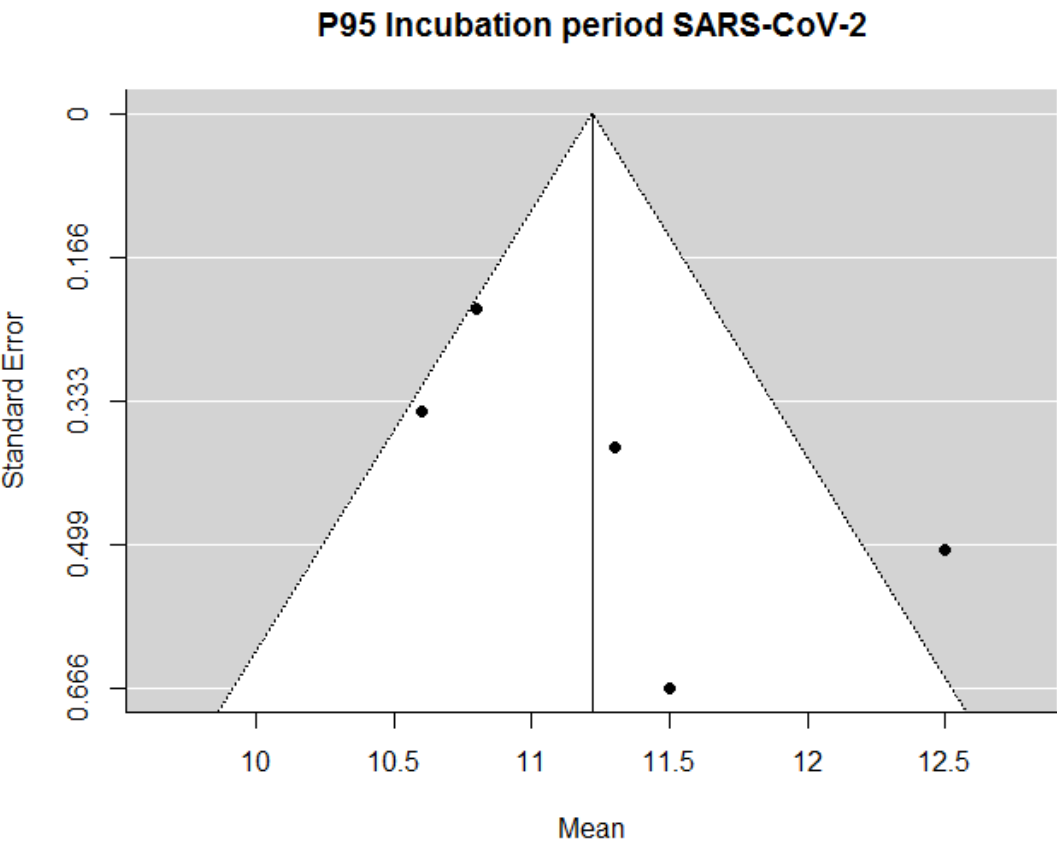

Supplement: mmc1 [file S2254887420301466:mmc1.pdf]
